# Supplementary material for: Effects of ligand functionalization on the band gaps and luminescent properties of a Zr12 oxo-cluster based metal–organic framework
Source: Royal Society of Chemistry journal article supplement (doi:10.1039/d0ce01843k), 2021-01-01
Supplement: d0ce01843k1.pdf [file d0ce01843k1.pdf]

Supplementary materials

**Effects of ligand functionalization on the band gaps and luminescent  
properties of a Zr<sub>12</sub> oxo-cluster based metal-organic framework**

Lin Zhou <sup>1</sup>, Feiyan Liu <sup>1</sup>, Ji Wang, Rongzhi Chen, Yunlin Chen \*

Institute of Applied Micro-Nano Materials, School of Science, Beijing Jiaotong University,  
Beijing 100044, China

\*Corresponding Author, E-mail: [ylchen@bjtu.edu.cn](mailto:ylchen@bjtu.edu.cn) (*Y. Chen*)

<sup>1</sup> These authors contributed equally to this work.

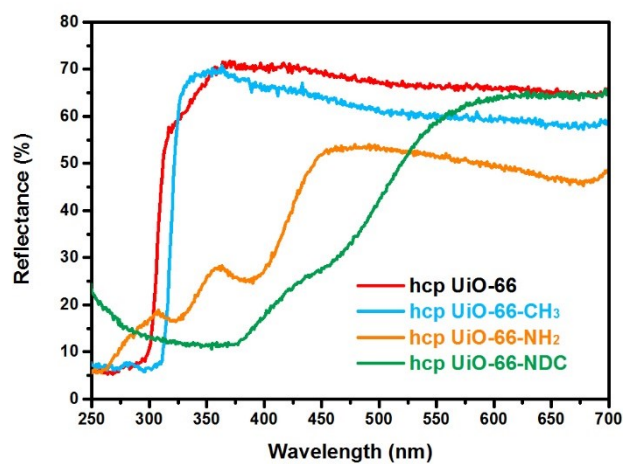

**Fig. S1** UV-vis diffuse reflectance spectra (DRS) of the synthesized samples.

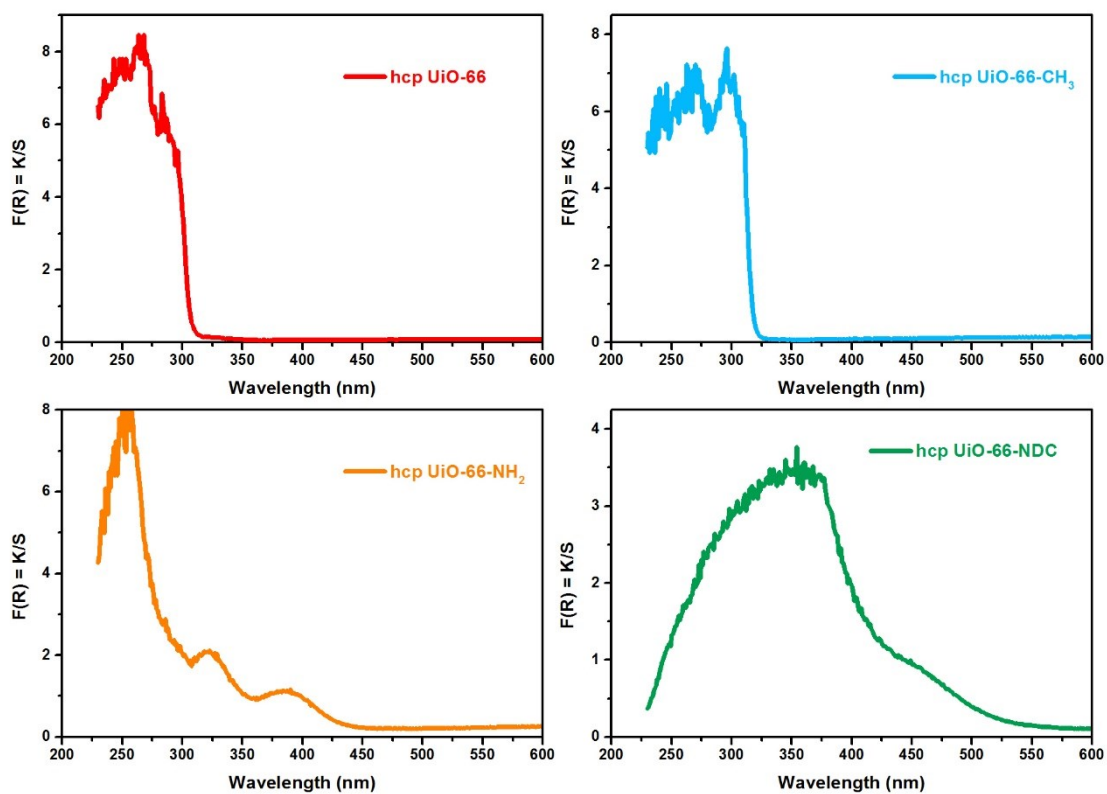

**Fig. S2** UV-Vis absorption spectra of samples obtained according to K-M function.

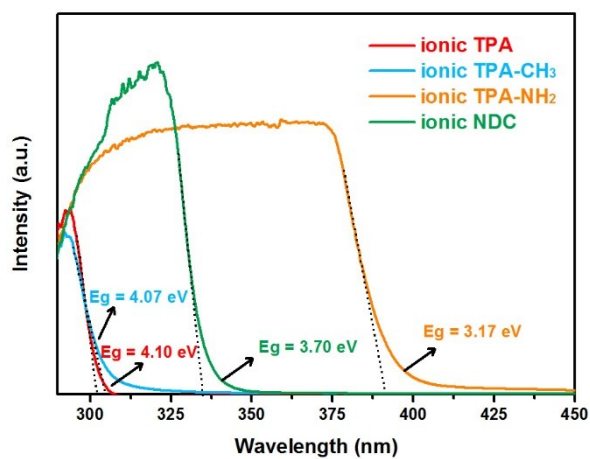

**Fig. S3** UV-vis absorption spectra of the ionic form ligand solutions.

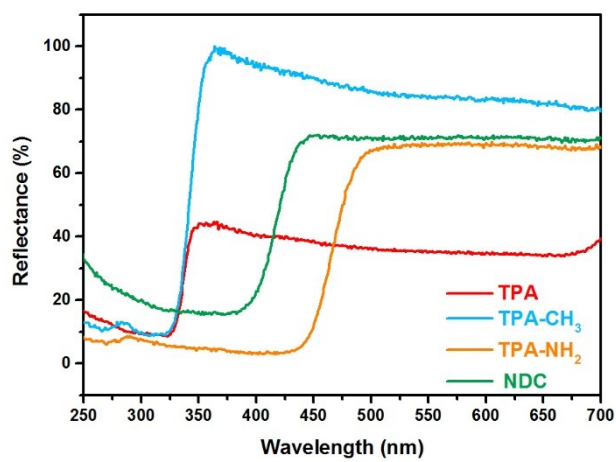

**Fig. S4** UV-vis DRS of the powder-form ligands.

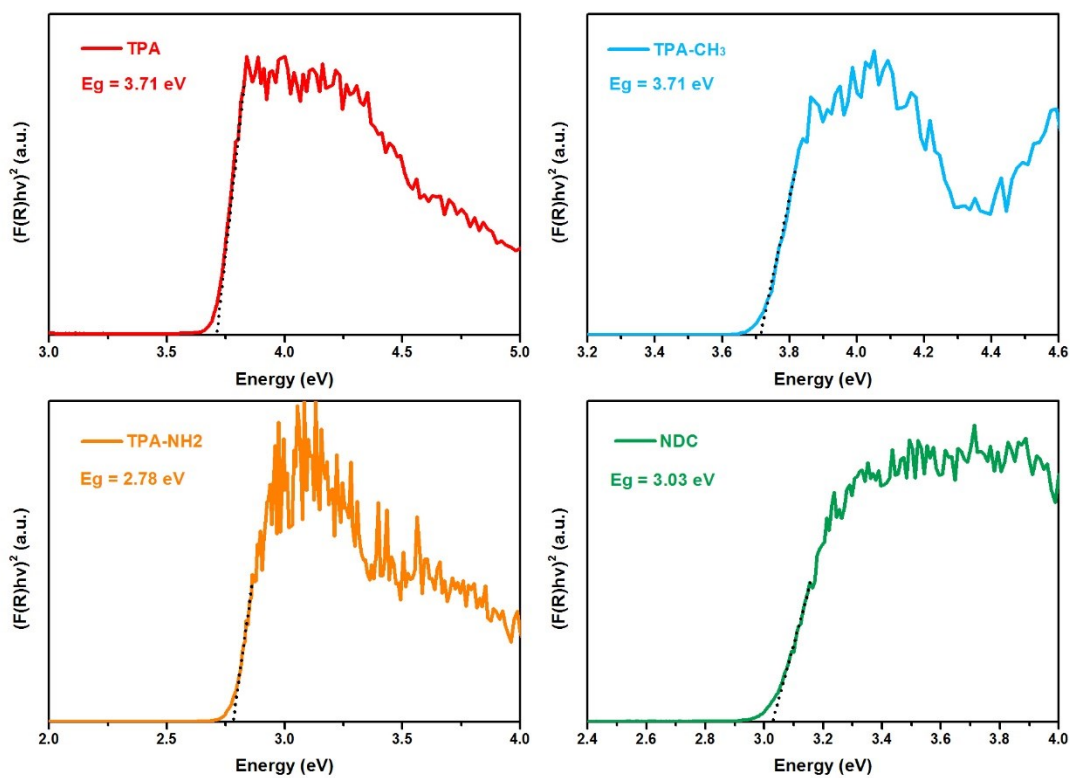

**Fig. S5** Tauc plots converting from the DRS of the powder-form ligands.

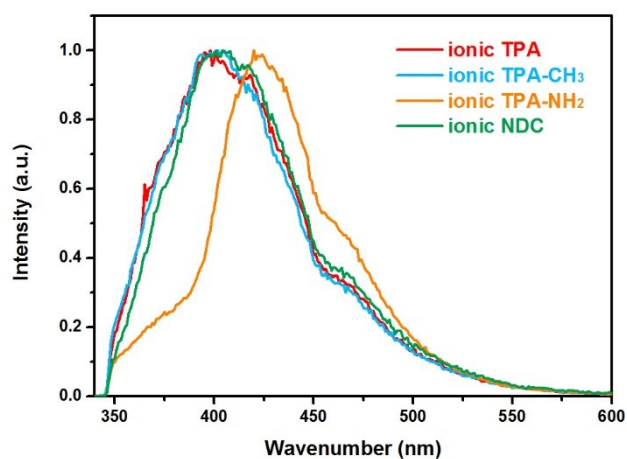

**Fig. S6** Normalized emission spectra of the ionic form ligand solutions.

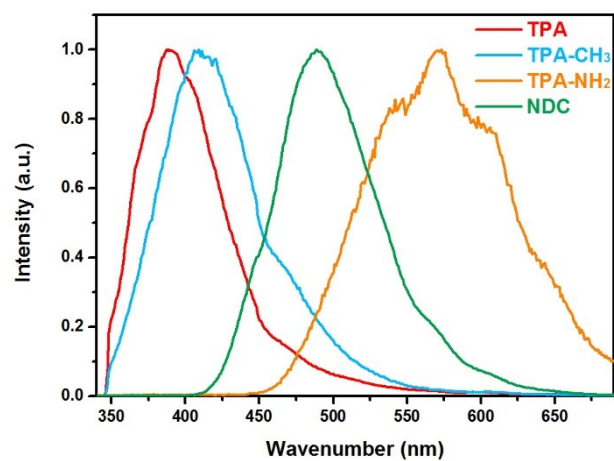

**Fig. S7** Normalized emission spectra of the powder-form ligands.
